# Supplementary material for: Dissipative non-equilibrium dynamics of self-assembled paramagnetic colloidal clusters
Source: Royal Society of Chemistry journal article supplement (doi:10.1039/d0sm02218g), 2021-01-01
Supplement: d0sm02218g4.pdf [file d0sm02218g4.pdf]

## **Dissipative non-equilibrium dynamics of self-assembled paramagnetic colloidal clusters**

Mohammed Elismaili, Lydiane Becu, Hong Xu, and David Gonzalez-Rodriguez

### **Supplementary Movie Captions**

#### **Supplementary Movie 1**

Self-assembly of paramagnetic particles (Dynabeads M-450) sedimented on the  $xy$  plane under a rotating magnetic field contained in the plane ( $B=1$  mT,  $\Omega=2960$  Hz). The movie shows the beginning (1 minute) and the end (1 minute) of a 10-minute experiment, and it is accelerated 4 times. The scale bar corresponds to 200  $\mu\text{m}$ .

#### **Supplementary Movie 2**

Disassembly of a paramagnetic particle cluster (Dynabeads M-450) contained in the  $xy$  plane under a constant field acting along the  $z$  direction ( $B=0.9$  mT). The field is switched on at the beginning of the movie ( $t=0$ ) and kept constant throughout. The movie is accelerated 4 times. The scale bar corresponds to 20  $\mu\text{m}$ .
